# Supplementary material
Source: publisher figshare collection journal article supplement (https://asha.figshare.com/ndownloader/files/22767905)
Supplement: Supplementary file 1 [file 22767905]

## Sheet: Table 1
Supplemental material, McFadd & Hustad, “Communication Modes and Functions in Children With Cerebral Palsy," JSLHR,
https://doi.org/10.1044/2020_JSLHR-19-00228
Supplemental Material S2.
Descriptive results showing the mean frequencies, standard deviations and total frequencies of all types of communication mode and function combinations for each group,
allowing for examination of mode/function relationships. ANAR = anarthria, SMI-LCI = speech motor impairment, language comprehension impairment,
SMI-LCT = speech motor impairment, typical language comprehension.
	ANAR			SMI-LCI				SMI-LCT
	m	sd	total	m	sd	total		m	sd	total
Vocalizations
Comment	0.07	0.27	1	15.07	9.91	226		22.1	14.88	221
Imitation	0	0	0	1.27	2.12	19		0.3	0.48	3
Initiation	0	0	0	3.87	3.4	58		1.8	1.81	18
Protest	0.07	0.27	1	0.53	0.83	8		0.1	0.32	1
Repair	0	0	0	0.53	0.92	8		0.8	1.03	8
Request	0	0	0	7.53	10.2	113		7.3	3.23	73
Response	0.93	2.37	13	13.4	6.25	201		13.6	9.69	136
Unknown	10.21	10.89	143	20.93	19.24	314		12.1	7.75	121
Total Vocalizations	10.53	0.07	158	63.13	24.61	947		58.1	21.43	581
Vocalizations + Gestures
Comment	0	0	0	1.33	2.29	20		0.6	0.97	6
Initiation	0	0	0	1.07	1.67	16		0.3	0.95	3
Protest	0	0	0	0.13	0.35	2		0	0	0
Repair	0	0	0	0.2	0.77	3		0	0	0
Request	0	0	0	0.73	0.96	11		0.5	0.85	5
Response	0.07	0.27	1	0.87	1.64	13		0.8	1.32	8
Unknown	0	0	0	0.67	1.05	10		0.2	0.42	2
Total Vocalizations + Gestures	0.07	0.26	1	5	6.69	75		2.4	3.69	24
Vocalizations + Signs
Response	0.07	0.27	1	0	0	0		0	0	0
Gesture
Comment	0.07	0.27	1	0.47	0.99	7		0.1	0.32	1
Initiation	0	0	0	0.6	0.99	9		0	0	0
Protest	0.14	0.53	2	0	0	0		0	0	0
Repair	0	0	0	0.07	0.26	1		0	0	0
Request	0	0	0	0.27	0.59	4		0.1	0.32	1
Response	1.07	2.53	15	1.6	2.29	24		0.2	0.63	2
Unknown	0	0	0	0.13	0.35	2		0.3	0.95	3
Total Gestures	1.2	2.45	18	3.13	3.09	47		0.7	1.25	7
AAC
Comment	0	0	0	0.07	0.26	1		0	0	0
Protest	0.5	1.87	7	0	0	0		0	0	0
Request	0	0	0	0.07	0.26	1		0	0	0
Response	1.7	6.41	24	0	0	0		0	0	0
Unknown	0	0	0	0.73	2.84	11		0	0	0
Total AAC	1.71	6.41	31	0.87	3.36	13		0	0	0
